# Supplementary material
Source: PubMed Central journal article supplement (PMC4737726)
Supplement: thnov06p0404s1.pdf [file thnov06p0404s1.pdf]

## **SUPPLEMENTARY MATERIAL**

### ***A Multifunctional Theranostic Nanoagent for Dual-Mode Image-Guided Synergistic HIFU-/Chemo Cancer Therapy***

Nan Zhang<sup>1, #</sup>, Xiaojun Cai<sup>2, #</sup>, Wei Gao<sup>1</sup>, Ronghui Wang<sup>1</sup>, Chunyan Xu<sup>1</sup>, Yuanzhi Yao<sup>1</sup>, Lan Hao<sup>1</sup>, Danli Sheng<sup>1</sup>, Hangrong Chen<sup>2\*</sup>, Zhigang Wang<sup>1\*</sup>, Yuanyi Zheng<sup>1\*</sup>

<sup>1</sup>. Second Affiliated Hospital of Chongqing Medical University & Chongqing Key Laboratory of Ultrasound Molecular Imaging, Chongqing, 400010, China.

<sup>2</sup>. State Key Laboratory of High-Performance Ceramics and Superfine Microstructure, Shanghai Institute of Ceramics, Chinese Academy of Sciences

<sup>#</sup> Nan Zhang and Xiaojun Cai are co-first authors who contributed equally to this study

<sup>\*</sup> Prof. Hangrong Chen, Yuanyi Zheng and Zhigang Wang are co-corresponding authors

#### **Address:**

Second Affiliated Hospital of Chongqing Medical University & Chongqing Key Laboratory of Ultrasound Molecular Imaging, 74 Linjiang Road, 400016, Chongqing, China

**TEL:** 86-023-63693709

**E-MAIL:** [zhengyuanyi@cqmu.edu.cn](mailto:zhengyuanyi@cqmu.edu.cn)

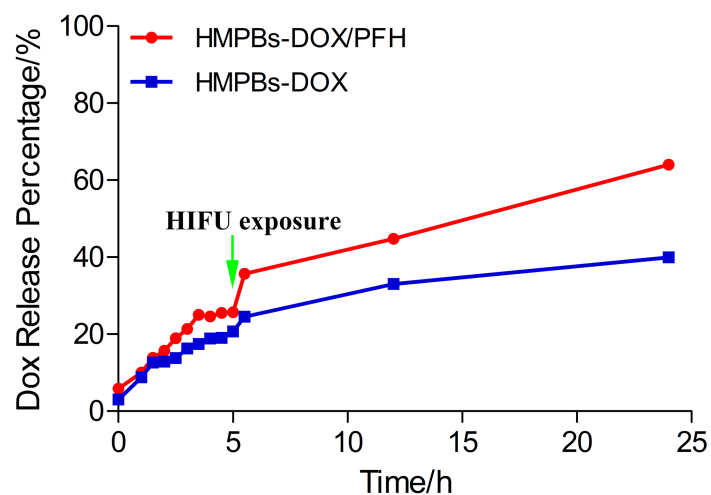

**Figure S1.** The DOX release curves in HMPBs-DOX/PFH group and HMPBs-DOX group with HIFU exposure. An obvious rise was exhibited in HMPBs-DOX/PFH group at 5 h for HIFU exposure.

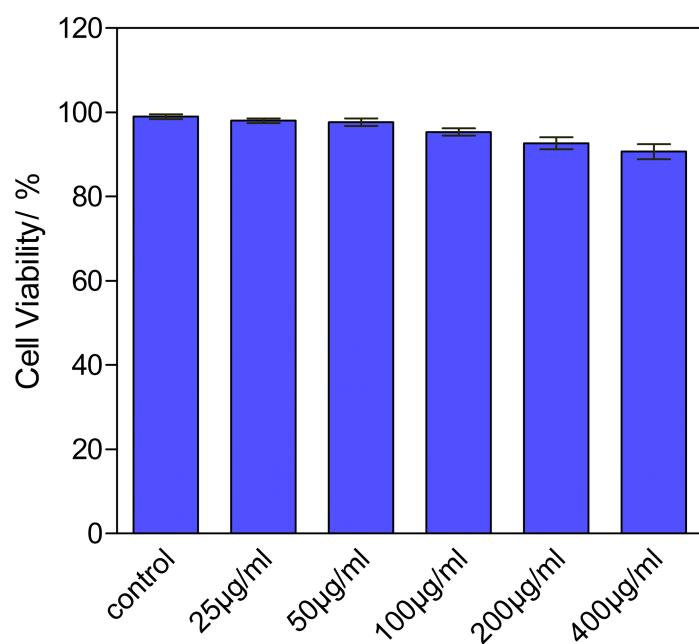

**Figure S2.** Cell Viability of HMPBs with different concentration.

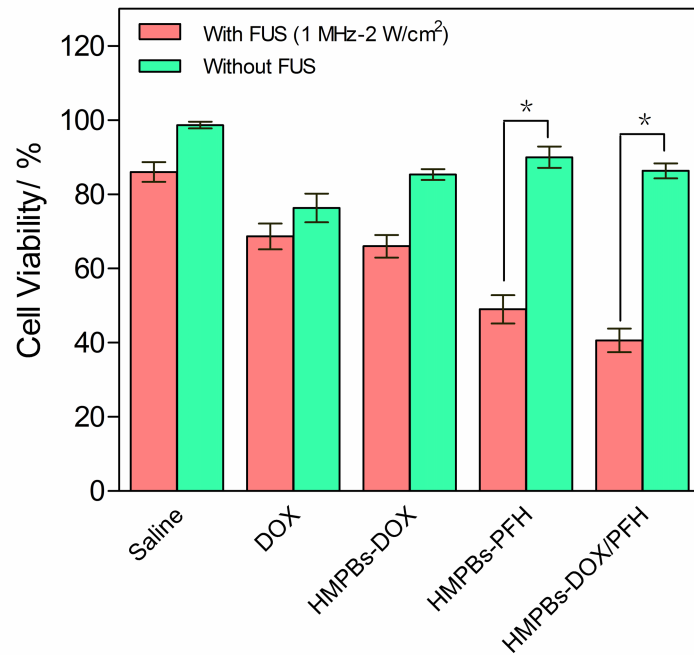

**Figure S3.** Viability of MB231 cells after incubated with saline, DOX, HMPBs-DOX, HMPBs-PFH, HMPBs-DOX-PFH for 18 h with and without FUS exposure by using 1 MHz transducer at 2 W/cm<sup>2</sup> in 60 s, respectively.

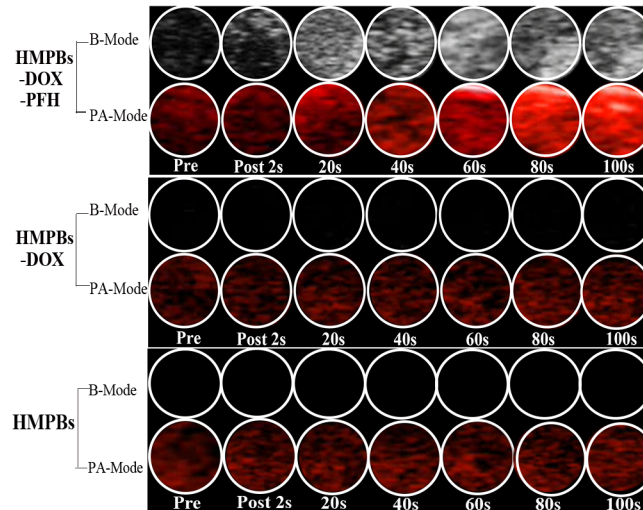

**Figure S4.** B-Mode and PA-Mode images of HMPBs-DOX/PFH, HMPBs-DOX and HMPBs before and after phase transition at different time-points (pre, post 2 s, 20 s, 40 s, 60 s, 80 s, 100 s). The US and PA imaging showed no distinct change between the HMPBs-DOX and HMPBs groups. It was found that as the heating time increasing, the echo intensity value of the B-mode images in the HMPBs-DOX/PFH

group rapidly increased for the initial 20 s and then stabilized after 20 s. As the heating time increased, the PA signal intensity of HMPBs-DOX/PFH group also kept increasing during the heating process, from  $1.067 \pm 0.467$  a.u. at the beginning to  $1.590 \pm 0.315$  a.u. after heating for 100 s. This enhancement was with a statistically higher amplitude than that of HMPBs group (from  $0.766 \pm 0.375$  a.u. to  $0.794 \pm 0.361$  a.u.) and HMPBs-DOX group (from  $0.814 \pm 0.341$  a.u. to  $0.775 \pm 0.395$  a.u.).

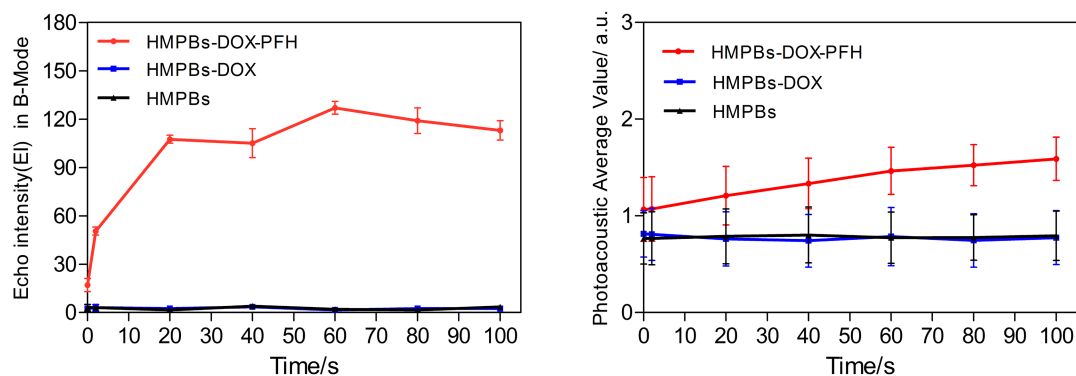

**Figure S5.** Echo Intensity (EI) in B-Mode and PA signal intensity before and after HIFU exposure at different time points. Echo intensity value of B-mode in HMPBs-DOX/PFH group rapidly increased from  $17 \pm 5.657$  to  $113 \pm 8.485$ . PA signal intensity in HMPBs-DOX/PFH group apparently increased from  $1.067 \pm 0.467$  a.u. to  $1.590 \pm 0.315$  a.u..

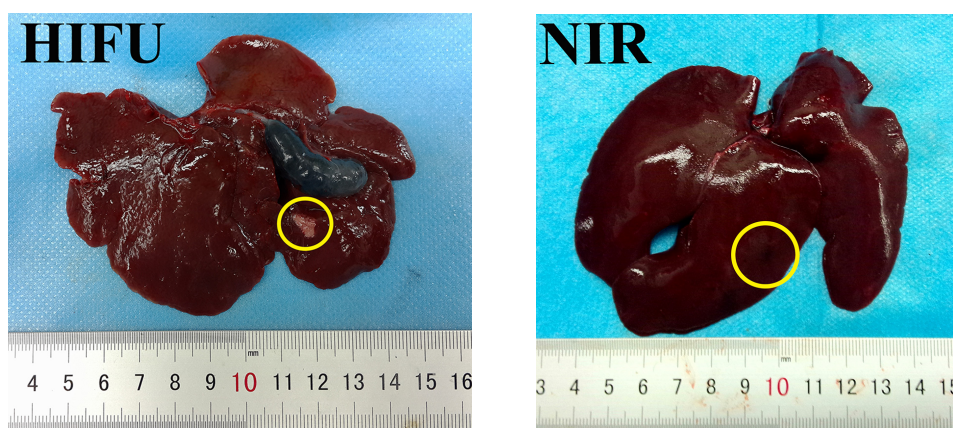

**Figure S6.** Digital photos of ablated rabbit livers exposed to HIFU at 120 W for 5 s (left) and exposed to NIR (right) under the same power of exposure after injection of 0.2 mL HMPBs-DOX/PFH, respectively.
